# Supplementary material for: A Case Series of Familial ARID1B Variants Illustrating Variable Expression and Suggestions to Update the ACMG Criteria
Source: MDPI journal article supplement (doi:10.3390/genes12081275), 2021-08-20
Supplement: s1 [file s1]

## **SUPPLEMENTARY MATERIAL**

### **A Case Series of Familial *ARID1B* Variants Illustrating Variable Expression And Suggestions to Update the ACMG Criteria**

PJ van der Sluijs, M Alders, AJM Dingemans, K Parbhoo, BW van Bon, JC Dempsey, D Doherty, JT den Dunnen, EH Gerkes, I Milller, S Moortgat, DS Regier, CAL Ruivenkamp, B Schmalz, T Smol, KE Stuurman, C Vincent-Delorme, BBA de Vries, B Sadikovic, SE Hickey, JA Rosenfeld, I Maystadt and GWE Santen

## Contents

|                           |       |
|---------------------------|-------|
| - Supplementary table S1  | p. 3  |
| - Supplementary table S2  | p. 4  |
| - Supplementary table S3  | p. 6  |
| - Supplementary figure S1 | p. 7  |
| - Supplementary figure S2 | p. 9  |
| - References              | p. 11 |

**Supplementary table S1:** overview of the variants of the *ARID1B* inherited cases on transcript NM\_020732.3 and NM\_001374828.1

| Case | Genomic location<br>(GRCh37)  | cDNA change<br>(NM_020732.3) | Protein change<br>(NM_020732.3) | Inheritance                                                          | cDNA change<br>(NM_001374828.1) | Protein change<br>(NM_001374828.1) |
|------|-------------------------------|------------------------------|---------------------------------|----------------------------------------------------------------------|---------------------------------|------------------------------------|
| 1    | g.157099066G>A                | c.3G>A                       | p.(Met1?)                       | Not maternal                                                         | c.252G>A                        | p.(Met84Ile)                       |
| 2    | g.157099424C>T                | c.361C>T                     | p.(Gln121*)                     | Paternal                                                             | c.610C>T                        | p.(Gln204*)                        |
| 3    | g.157099426_<br>157099427insG | c.363_364insG                | p.(Gln122fs*110)                | Unknown                                                              | c.612_613insG                   | p.(Gln205Alafs*110)                |
| 4    | g.157099584dup                | c.521dup                     | p.(Pro177fs*55)                 | Maternal                                                             | c.770dup                        | p.(Pro260Alafs*55)                 |
| 5    | g.157100092_<br>157100119del  | c.1029_1056del               | p.(Ala349Metfs*11)              | Maternal                                                             | c.1278_1305del                  | p.(Ala432Metfs*11)                 |
| 6    | g.157100107_<br>157100134del  | c.1044_1071del               | p.(Ala349Metfs*11)              | Maternal                                                             | c.1293_1320del                  | p.(Ala432Metfs*11)                 |
| 7    | g.157100107_<br>157100125del  | c.1044_1062del               | p.(Gly351Alafs*12)              | Paternal                                                             | c.1293_1311del                  | p.(Gly434Alafs*12)                 |
| 8    | -                             | exon 3-4 deletion            | p.?                             | Paternal                                                             | exon 3 deletion                 | p.?                                |
| 9    | g.157431697T>C                | c.2371+2T>C                  | r.spl?                          | Unknown                                                              | c.2581+2T>C                     | r.spl?                             |
| 10   | g.157454160A>C                | c.2372-2A>C*                 | r.spl?                          | Maternal                                                             | c.2582-2A>C                     | r.spl?                             |
| 11   | g.157522598C>T                | c.4870C>T                    | p.(Arg1624*)                    | Father is inconclusively<br>mosaic. Mother is<br>negative. Siblings. | c.5239C>T                       | p.(Arg1747*)                       |
| 12   | g.157528597C>T                | c.6322C>T                    | p.(Gln2108*)                    | Paternal, mosaic father                                              | c.6691C>T                       | p.(Gln2231*)                       |

**Supplementary table S2:** overview of the clustering of photographs of *ARID1B* inherited cases in comparison to *ARID1B* outpatient clinic cases

| Case* | Photograph | Age (years) | Sex    | <i>ARID1B</i> clustering (positive = like <i>ARID1B</i> ,<br>negative = like matched controls) | F2G rank | F2G similarity<br>to CSS |
|-------|------------|-------------|--------|------------------------------------------------------------------------------------------------|----------|--------------------------|
| 1.1   | 1.1_1      | 20          | male   | positive                                                                                       | 2        | 0.32                     |
| 2.1   | 2.1_1      | 11.50       | female | negative                                                                                       | 7        | 0.29                     |
|       | 2.1_2      | 11.50       |        | positive                                                                                       | 8        | 0.31                     |
|       | 2.1_3      | 4.1         |        | processing of photograph failed                                                                | 1        | 0.58                     |
|       | 2.1_4      | 2.67        |        | processing of photograph failed                                                                | 2        | 0.13                     |
|       | 2.1_5      | 2.67        |        | processing of photograph failed                                                                | 5        | 0.13                     |
|       | 2.1_6      | 2.25        |        | positive                                                                                       | 2        | 0.14                     |
| 2.2   | 2.2_1      | 47          | male   | processing of photograph failed                                                                | 31       | 0.11                     |
|       | 2.2_2      | 47          |        | negative                                                                                       | 31       | 0.11                     |
| 4.1   | 4.1_1      | 1.42        | male   | positive                                                                                       | 1        | 0.13                     |
| 4.2   | 4.2_1      | 36          | female | negative                                                                                       | 31       | 0.13                     |
| 5.1   | 5.1_1      | 10          | male   | positive                                                                                       | 19       | 0.08                     |
| 6.1   | 6.1_1      | 4           | female | positive                                                                                       | 1        | 0.38                     |
| 7.1   | 7.1_1      | 8           | female | positive                                                                                       | 1        | 0.20                     |
|       | 7.1_2      | 7           |        | positive                                                                                       | 7        | 0.31                     |
|       | 7.1_3      | 7           |        | positive                                                                                       | 1        | 0.31                     |
|       | 7.1_4      | 5           |        | processing of photograph failed                                                                | 1        | 0.59                     |
|       | 7.1_5      | 5           |        | positive                                                                                       | 1        | 0.83                     |
|       | 7.1_6      | 5           |        | positive                                                                                       | 1        | 0.54                     |
|       | 7.1_7      | 4           |        | positive                                                                                       | 2        | 0.17                     |
|       | 7.1_8      | 0.17        |        | positive                                                                                       | 1        | 0.56                     |
|       | 7.1_9      | 0.17        |        | processing of photograph failed                                                                | 1        | 0.24                     |
|       | 7.1_10     | 0.17        |        | positive                                                                                       | 1        | 0.43                     |
| 7.2   | 7.2_1      | 25          | male   | negative                                                                                       | 31       | 0.04                     |
|       | 7.2_2      | 14          |        | negative                                                                                       | 16       | 0.07                     |
|       | 7.2_3      | 8           |        | processing of photograph failed                                                                | 17       | 0.06                     |
|       | 7.2_4      | 7           |        | negative                                                                                       | 16       | 0.15                     |
|       | 7.2_5      | 3           |        | processing of photograph failed                                                                | 8        | 0.15                     |
|       | 7.2_6      | 1           |        | negative                                                                                       | 4        | 0.17                     |

\* [case number].1 is the proband/child, [case number].2 is the parent

Continuation of supplementary table S2: overview of the clustering of photographs of *ARID1B* inherited cases in comparison to *ARID1B* outpatient clinic cases

| Case* | Photograph | Age (years) | Sex  | <i>ARID1B</i> clustering (positive = like <i>ARID1B</i> ,<br>negative = like matched controls) | F2G rank | F2G similarity<br>to CSS |
|-------|------------|-------------|------|------------------------------------------------------------------------------------------------|----------|--------------------------|
| 12.1  | 12.1_1     | 8           | male | positive                                                                                       | 1        | 0.78                     |
|       | 12.1_2     | 3.58        |      | positive                                                                                       | 1        | 0.51                     |
|       | 12.1_3     | 3.17        |      | positive                                                                                       | 1        | 0.82                     |
|       | 12.1_4     | 2.25        |      | positive                                                                                       | 1        | 0.91                     |
| 12.2  | 12.2_1     | 40          | male | processing of photograph failed                                                                | 7        | 0.10                     |
|       | 12.2_2     | 18          |      | positive                                                                                       | 1        | 0.34                     |
|       | 12.2_3     | 10          |      | positive                                                                                       | 1        | 0.54                     |
|       | 12.2_4     | 4           |      | positive                                                                                       | 2        | 0.23                     |
|       | 12.2_5     | 0.58        |      | positive                                                                                       | 1        | 0.37                     |

\* [case number].1 is the proband/child, [case number].2 is the parent

**Supplementary table S3:** previously reported inherited loss of function *ARID1B* variants.

| Number of offspring carrying the variant | <i>ARID1B</i> variant                  | Exon      | Mutation type | Patient's phenotype                                                                                                                                               | Parent's phenotype                                                                   | Reference              | Pathogenicity      |
|------------------------------------------|----------------------------------------|-----------|---------------|-------------------------------------------------------------------------------------------------------------------------------------------------------------------|--------------------------------------------------------------------------------------|------------------------|--------------------|
| 1                                        | c.1259delA;<br>p.(Asn420Ilefs*10)      | 1         | Frameshift    | CSS-like: ID, neurodevelopmental delays, short stature, and dysmorphic features                                                                                   | Similarly affected: neurodevelopmental delays, growth delay, and dysmorphic features | Smith 2016[1]          | Pathogenic variant |
| 1                                        | c.1762G>T;<br>p.(Glu588*)              | 3         | Nonsense      | n.r.                                                                                                                                                              | Unaffected                                                                           | Johnston 2015[2]       | Unlikely           |
| 2                                        | c.1762G>T;<br>p.(Glu588*)              | 3         | Nonsense      | Autism spectrum disorder, male monozygotic-twins                                                                                                                  | N.r./in mother                                                                       | Yuen et al 2017[3]     | n.r.               |
| 1                                        | c.1927-2A>G                            | Intron 4  | Splice site   | Abnormal head shape; bone abnormality - osteopoikilosis; seasonal allergies; undescended testicle repaired at age 2; bipolar/mood disorder symptoms; OCD symptoms | N.r.                                                                                 | Yuen et al 2017[3]     | n.r.               |
| 1                                        | c.2037+46454_3551-1154del              | 6-13      | Duplication   | Short stature, language impairment, dysmorphic features, ID                                                                                                       | N.r./in mother                                                                       | Yu et al 2015[4]       | Pathogenic variant |
| 2                                        | c.2038-52488_2371+613del               | 6-7       | Deletion      | CSS(-like), severe ID, coarse facial features, widely spaced teeth, neurodevelopmental delays, no speech, normal growth, seizures, hypertrichosis, hyperactivity  | Unaffected; gonadal mosaicism proposed                                               | Van der Sluijs 2018[5] | Pathogenic variant |
| 2                                        | c.2372-2A>C                            | Intron 7  | Splice site   | Autism spectrum disorder, no ID                                                                                                                                   | N.r./in father                                                                       | Ruzzo et al 2019[6]    | n.r.               |
| 2                                        | c.3468_3471del;<br>p.(Glu1157Valfs*53) | 13        | Frameshift    | ID, speech delay and dysmorphic features.                                                                                                                         | Unaffected/ mother, mosaic (4% of reads in blood)                                    | Min et al 2021[7]      | Pathogenic variant |
| 2                                        | c.4013+1G>A                            | Intron 16 | Splice site   | Autism spectrum disorder                                                                                                                                          | N.r./in mother                                                                       | Yuen et al 2017[3]     | n.r.               |
| 3                                        | c.4357C>T;<br>p.(Gln1443*)             | 18        | Nonsense      | CSS-like: ID, dysmorphic features, 2 of the 3 sibling have hypoplasia corpus callosum                                                                             | Unaffected; gonadal mosaicism proposed                                               | Ben-Salem 2016[8]      | Pathogenic variant |
| 1                                        | c.5830C>T;<br>p.(Arg1944*)             | 20        | Nonsense      | Neurodevelopmental disorder                                                                                                                                       | N.r./father mosaic (7% of reads in blood)                                            | Cherot et al 2017[9]   | Pathogenic variant |
| 2                                        | c.6726_6730del;<br>p.(Leu2243Serfs*8)  | 20        | Frameshift    | CSS: mild to moderate ID, short stature, ASD, behaviour anomalies and dysmorphic features                                                                         | Mildly affected/ mother mosaic                                                       | Cheng et al 2021[10]   | Pathogenic variant |

Used transcript: NM\_020732.3

Abbreviations: CSS: Coffin-Siris syndrome, ID: intellectual disability, n.r.: not reported, OCD: obsessive compulsive disorder

**Supplementary figure S1:** (A) t-SNE plot depicting clustering of photographs of familial *ARID1B* cases (1 photograph per case was included) compared to confirmed *ARID1B* patients aged <10 years photographs and age-, sex-, and ethnicity matched controls with intellectual disability. (B) t-SNE plot depicting clustering of photographs of familial *ARID1B* cases compared to confirmed *ARID1B* patients' photographs and matched controls

*t-SNE is a method for visualizing high-dimensional data. Since the hybrid model outputs a 468 dimensional feature vector, it is not possible to display these data on two axis, which only allow for the demonstration of two dimensions. t-SNE attempts to summarize the high-dimensional data in two dimensions, allowing visualization.*

**A**

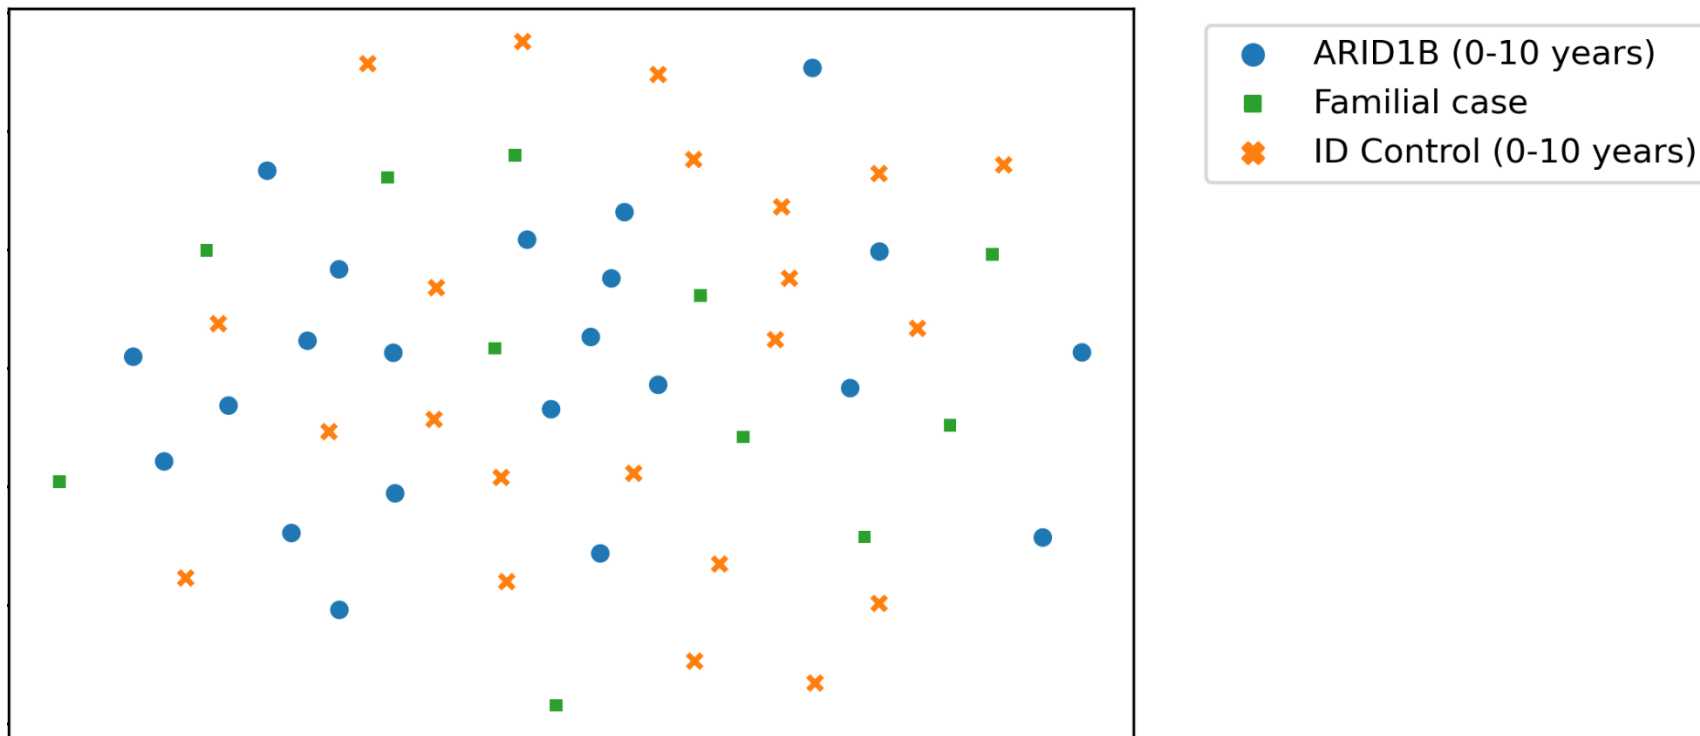

B

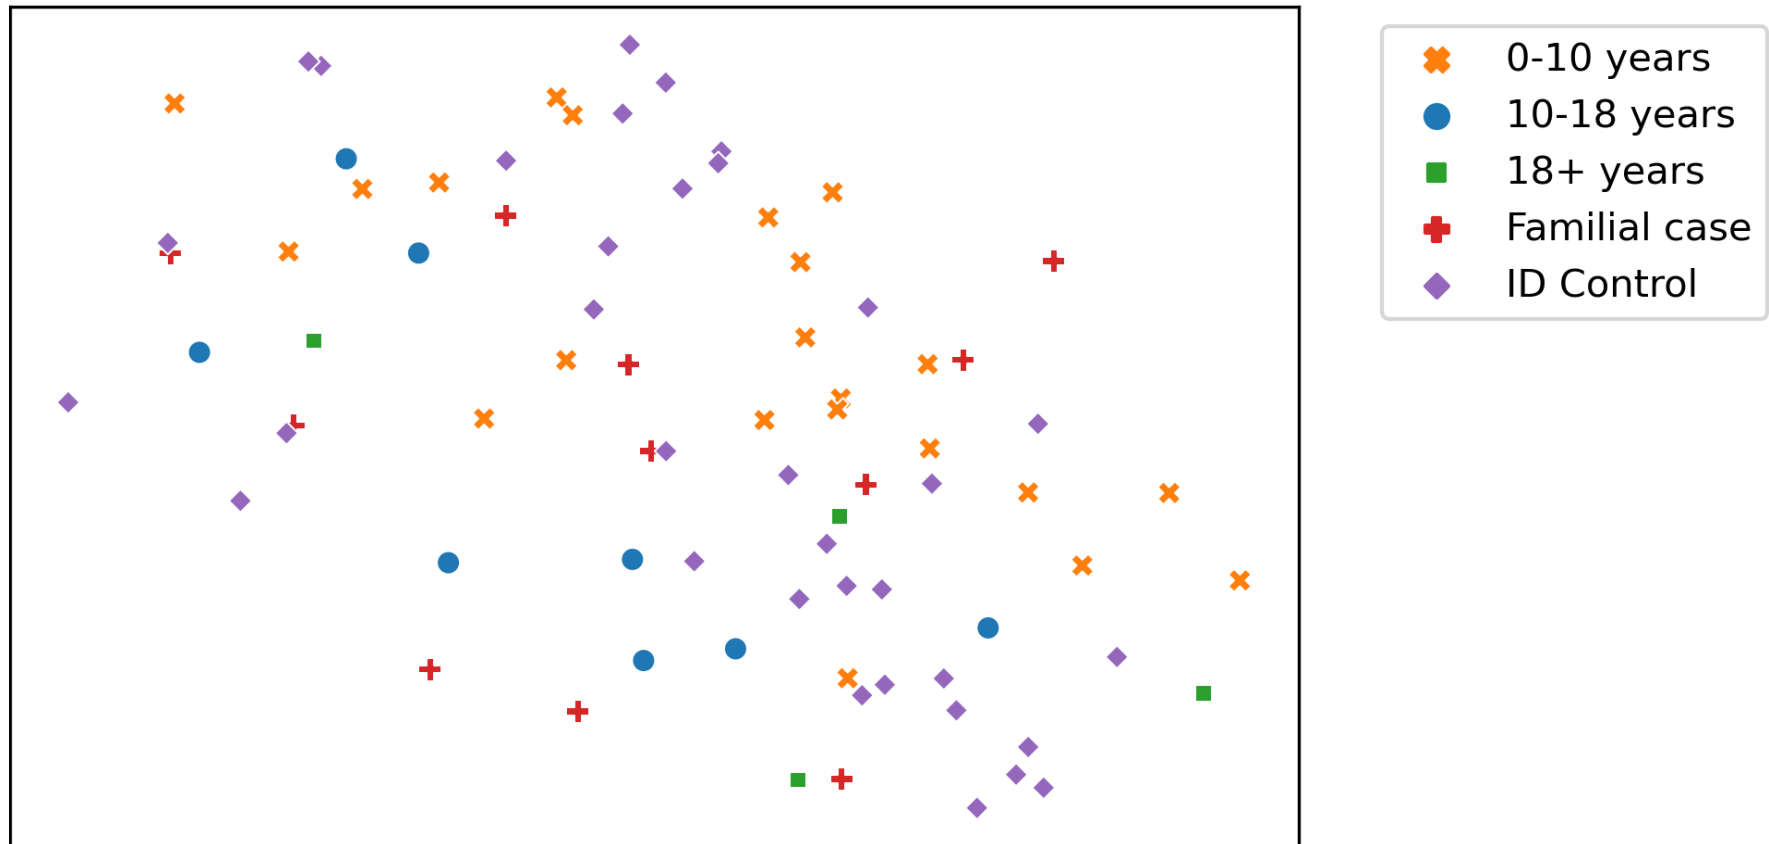



**Supplementary figure S2:** depicting similarity and ranking of facial photographs of the familial *ARID1B* cases\* in F2G. **(A+B)\*\*** Scatterplot depicting the similarity **(A)** or ranking **(B)** of facial photographs to CSS in F2G, one photograph per familial *ARID1B* case included. **(C + D)\*\*** Scatterplot depicting the similarity **(C)** or ranking **(D)** of facial photographs to CSS in F2G of the familial *ARID1B* cases with multiple facial photographs available

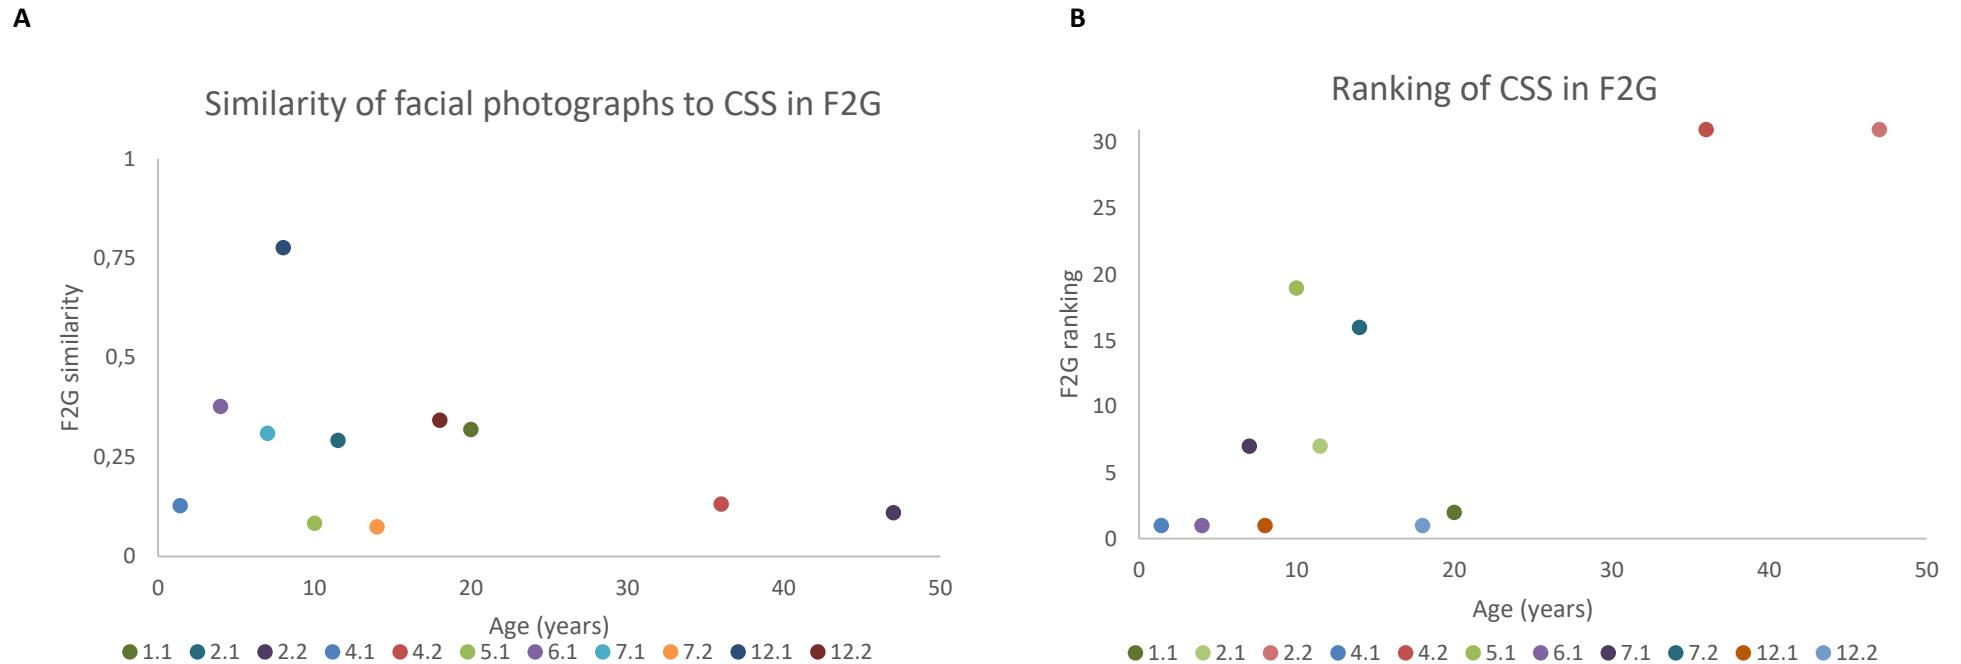

**C**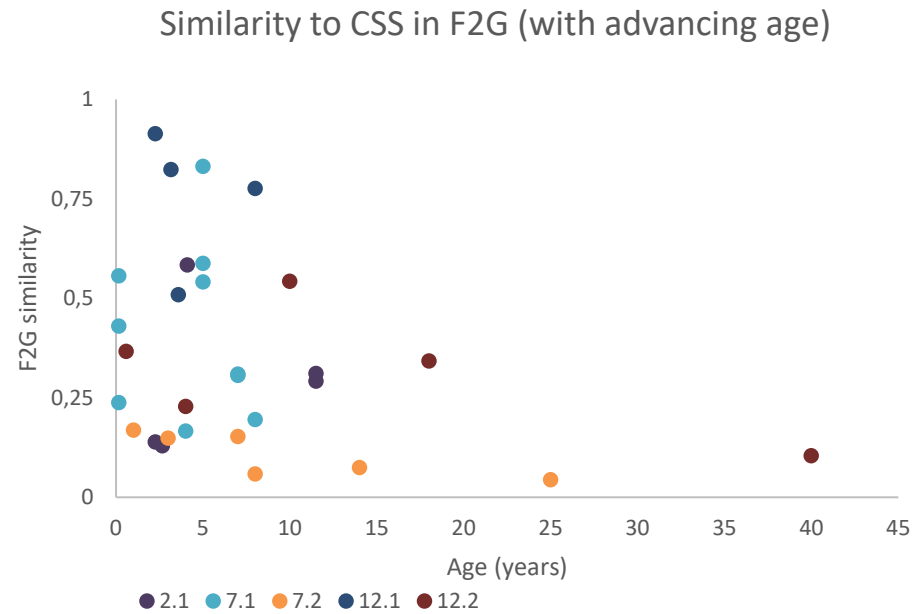**D**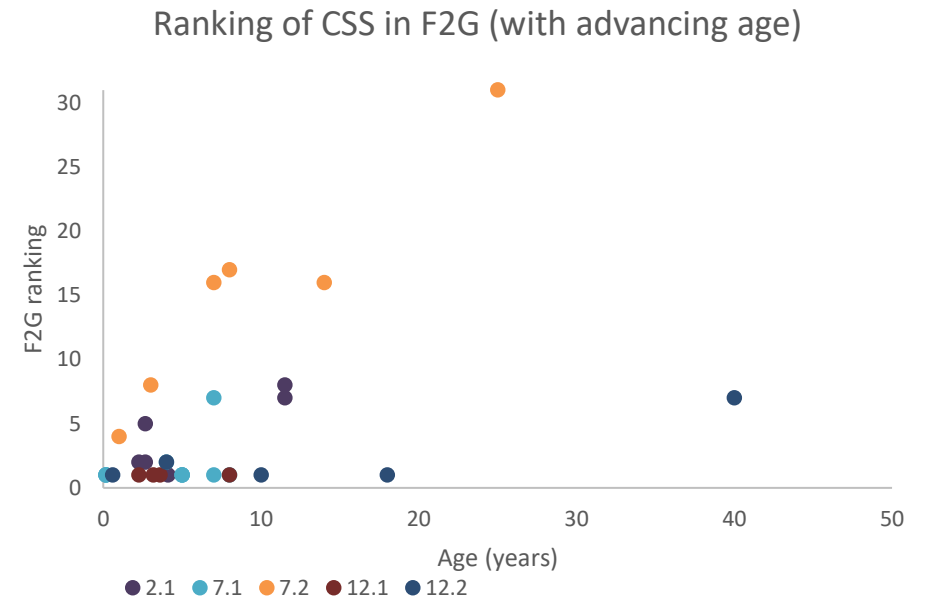

Abbreviations: CSS: Coffin-Siris syndrome, F2G: Face2Gene

\* [casenumber].1 is child/proband (e.g. 7.1), [casenumber].2 is parent (e.g. 7.2)

\*\* If Coffin-Siris syndrome was not in F2G's top 30 of suggested syndrome rank 31 was allocated in the figure

## References:

1. Smith, J.A.; Holden, K.R.; Friez, M.J.; Jones, J.R.; Lyons, M.J. A novel familial autosomal dominant mutation in *ARID1B* causing neurodevelopmental delays, short stature, and dysmorphic features. *Am J Med Genet A* **2016**, *170*, 3313-3318, doi:10.1002/ajmg.a.37945.
2. Johnston, J.J.; Lewis, K.L.; Ng, D.; Singh, L.N.; Wynter, J.; Brewer, C.; Brooks, B.P.; Brownell, I.; Candotti, F.; Gonsalves, S.G.; et al. Individualized iterative phenotyping for genome-wide analysis of loss-of-function mutations. *Am J Hum Genet* **2015**, *96*, 913-925, doi:10.1016/j.ajhg.2015.04.013.
3. Yuen, R.K.C.; Merico, D.; Bookman, M.; J, L.H.; Thiruvahindrapuram, B.; Patel, R.V.; Whitney, J.; Deflaux, N.; Bingham, J.; Wang, Z.; et al. Whole genome sequencing resource identifies 18 new candidate genes for autism spectrum disorder. *Nat Neurosci* **2017**, *20*, 602-611, doi:10.1038/nn.4524.
4. Yu, Y.; Yao, R.; Wang, L.; Fan, Y.; Huang, X.; Hirschhorn, J.; Dauber, A.; Shen, Y. De novo mutations in *ARID1B* associated with both syndromic and non-syndromic short stature. *BMC Genomics* **2015**, *16*, 701, doi:10.1186/s12864-015-1898-1.
5. van der Sluijs, P.J.; Jansen, S.; Vergano, S.A.; Adachi-Fukuda, M.; Alanay, Y.; AlKindy, A.; Baban, A.; Bayat, A.; Beck-Wödl, S.; Berry, K.; et al. The *ARID1B* spectrum in 143 patients: from nonsyndromic intellectual disability to Coffin–Siris syndrome. *Genetics in Medicine* **2018**, doi:10.1038/s41436-018-0330-z.
6. Ruzzo, E.K.; Perez-Cano, L.; Jung, J.Y.; Wang, L.K.; Kashef-Haghighi, D.; Hartl, C.; Singh, C.; Xu, J.; Hoekstra, J.N.; Leventhal, O.; et al. Inherited and De Novo Genetic Risk for Autism Impacts Shared Networks. *Cell* **2019**, *178*, 850-866 e826, doi:10.1016/j.cell.2019.07.015.
7. Min, Z.; Qian, C.; Ying, D. Novel *ARID1B* variant inherited from somatogonadal mosaic mother in siblings with Coffin-Siris syndrome 1. *Exp Ther Med* **2021**, *21*, 614, doi:10.3892/etm.2021.10046.
8. Ben-Salem, S.; Sobreira, N.; Akawi, N.A.; Al-Shamsi, A.M.; John, A.; Pramathan, T.; Valle, D.; Ali, B.R.; Al-Gazali, L. Gonadal mosaicism in *ARID1B* gene causes intellectual disability and dysmorphic features in three siblings. *Am J Med Genet A* **2016**, *170A*, 156-161, doi:10.1002/ajmg.a.37405.
9. Cherot, E.; Keren, B.; Dubourg, C.; Carre, W.; Fradin, M.; Lavillaureix, A.; Afenjar, A.; Burglen, L.; Whalen, S.; Charles, P.; et al. Using medical exome sequencing to identify the causes of neurodevelopmental disorders: Experience of 2 clinical units and 216 patients. *Clin Genet* **2018**, *93*, 567-576, doi:10.1111/cge.13102.
10. Cheng, S.S.W.; Luk, H.M.; Mok, M.T.; Leung, S.S.; Lo, I.F.M. Genotype and phenotype in 18 Chinese patients with Coffin-Siris syndrome. *Am J Med Genet A* **2021**, doi:10.1002/ajmg.a.62187.
